# Supplementary material for: Chiral lyotropic chromonic liquid crystals composed of disodium cromoglycate doped with water-soluble chiral additives
Source: Royal Society of Chemistry journal article supplement (doi:10.1039/c7sm02262j), 2018-01-01
Supplement: c7sm02262j1.pdf [file c7sm02262j1.pdf]

## Electronic Supplementary Information

# **Chiral lyotropic chromonic liquid crystal composed of disodium cromoglycate doped with water-soluble chiral additives**

Tatsuya Shirai,<sup>a</sup> Min Shuai,<sup>b</sup> Keita Nakamura,<sup>a</sup> Akihiro Yamaguchi,<sup>b,c</sup> Yumiko Naka,<sup>a</sup> Takeo Sasaki,<sup>a</sup> Noel A. Clark\*<sup>b</sup> and Khoa V. Le\*<sup>a</sup>

<sup>a</sup> *Department of Chemistry, Faculty of Science, Tokyo University of Science, 1-3 Kagurazaka, Shinjuku-ku, Tokyo 162-8601, Japan. E-mail: khoa@rs.tus.ac.jp*

<sup>b</sup> *Department of Physics and Soft Materials Research Center, University of Colorado, Boulder, Colorado 80309-0390, USA. E-mail: noel.clark@colorado.edu*

<sup>c</sup> *Department of Physics and Center for Soft Matter Research, New York University, New York 10003, USA.*

## FFTEM (freeze-fractured transmission electron microscopy) observation

### Method

The samples were sandwiched between 2 mm × 3 mm glass planchettes with untreated surfaces and quenched from N or N\* phase at room temperature to  $-180^{\circ}\text{C}$  by sudden immersion in liquid propane. They were subsequently fractured under high vacuum at  $-140^{\circ}\text{C}$  by a freeze-etching system (BAF 060, BAL-TEC). The fractured surfaces were then deposited with a 2 nm-thick layer of platinum at an oblique angle ( $45^{\circ}$ ) and  $\approx 20$  nm of carbon layer (at  $90^{\circ}$ ) to create the Pt-C replicas for TEM (CM10, Philips) observations. Images were taken with a TEM-mounted 1K × 1K Gatan Bioscan digital camera. The surfaces facing the platinum depositing direction appear darker and thus make the contrast in the TEM images. The images were analyzed using a free software ImageJ.

### Results

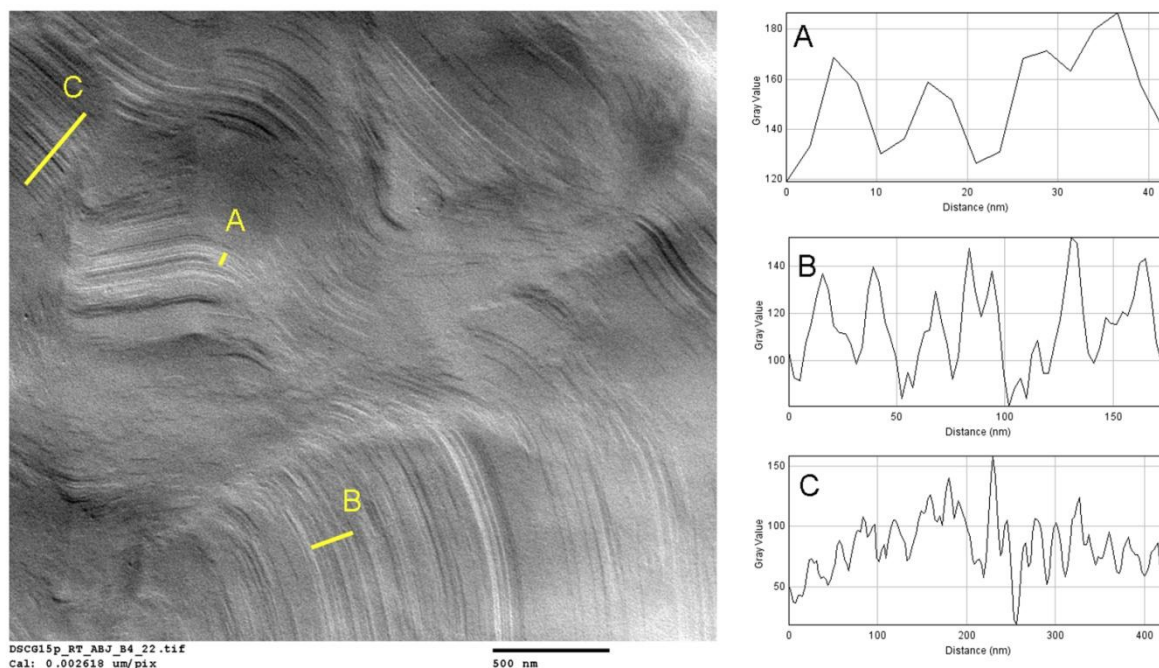

Fig. S1. Nematic (N) phase of 15 wt% DSCG/water (magnification 34000x). The height variation profiles along the A, B, C lines are also shown, with the mean stripe widths of 11.2 , 12.5, 14.7 nm, respectively.

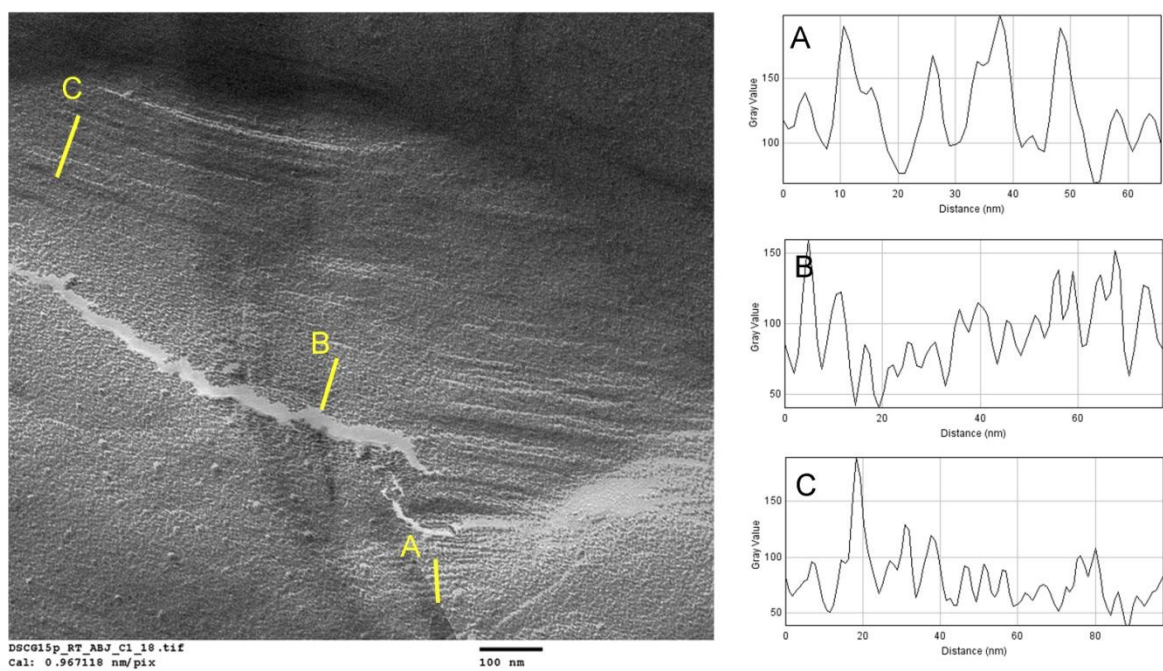

Fig. S2. Another sample of N phase of 15 wt% DSCG/water observed at a larger magnification (92000x). The height variation profiles along the A, B, C lines are also shown, with the mean stripe widths of 6.5, 5.0, 5.2 nm, respectively.

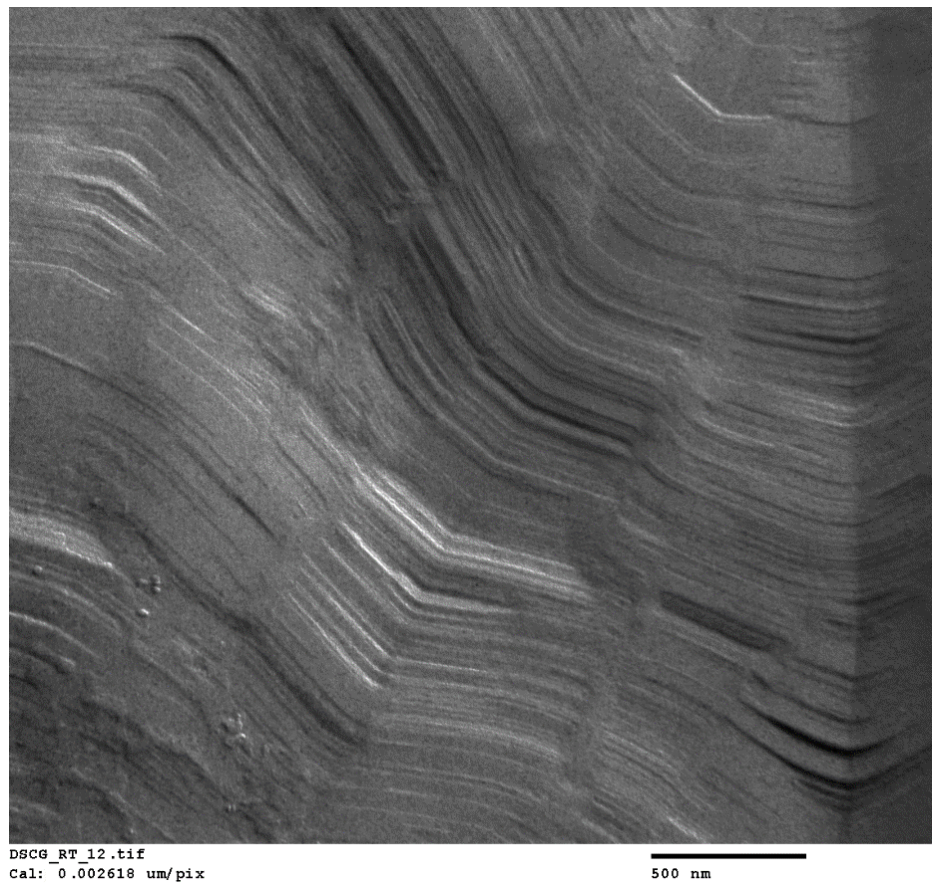

Fig. S3. The columnar (M) phase shows stronger stripe patterning, where the stripes are more regular, and tend to extend much longer along the column direction than in the N phase.

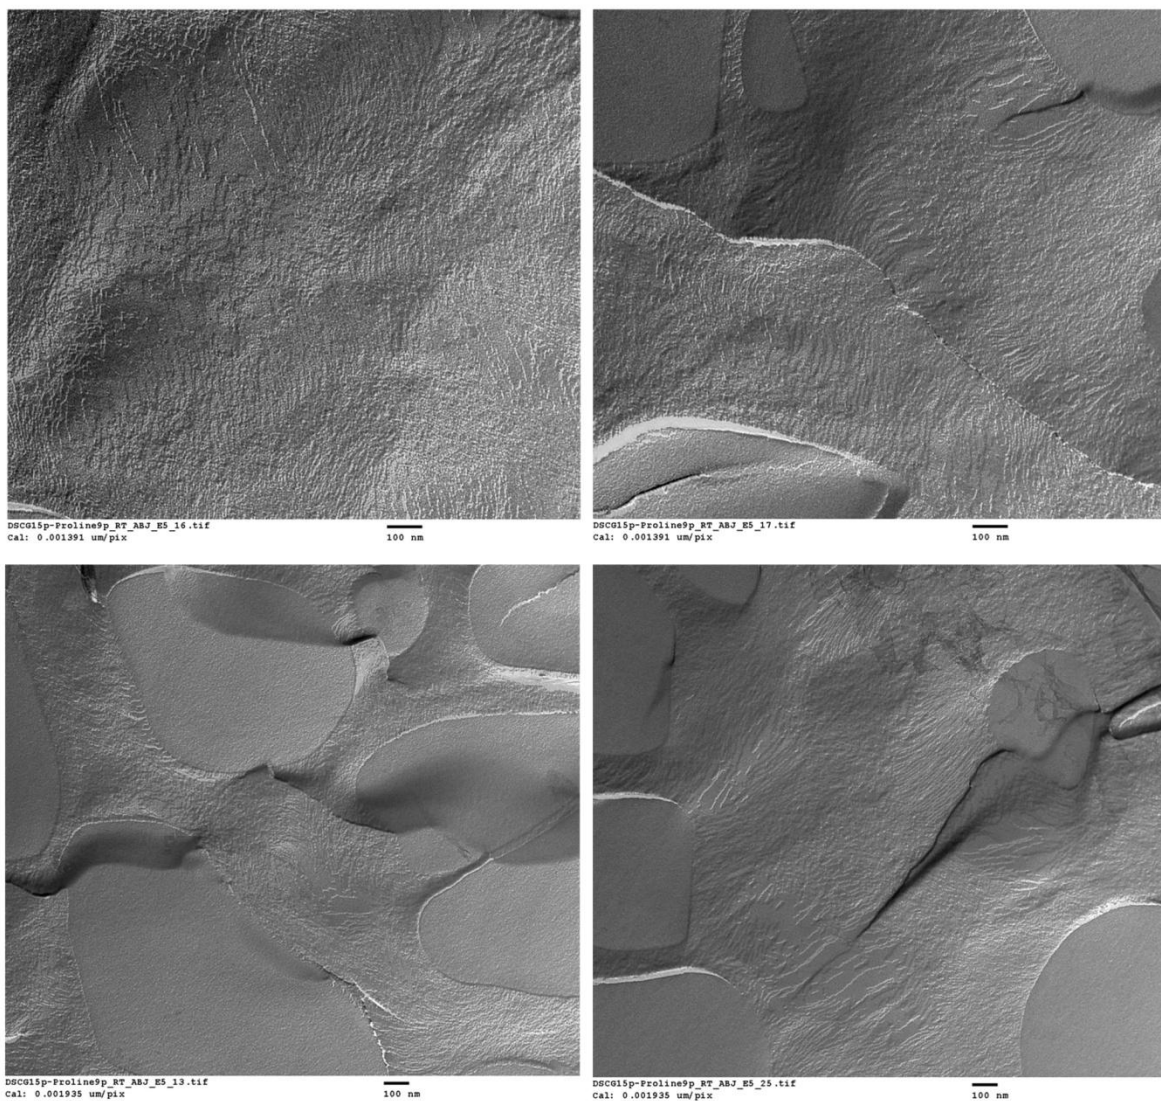

Fig. S4. Cholesteric (N\*) sample of 9 wt% trans-4-Hydroxy-L-proline in 15 wt% DSCG/water observed at different positions. Comparing with the N samples, the aggregates/bundles of aggregates orient more randomly. Domains with no stripes were sometimes observed, although the reason behind is still unclear to us. Note that the N\* pitch is 8.7  $\mu\text{m}$ , which is very much larger than the dimension of the image.
